# Supplementary material for: Did the right to health get across the line? Examining the United Nations resolution on the Sustainable Development Goals
Source: PubMed Central journal article supplement — BMJ Glob Health. 2017 Sep 14;2(3):e000353. doi: 10.1136/bmjgh-2017-000353 (PMC5717936; doi:10.1136/bmjgh-2017-000353), 2017-09-14
Supplement: bmjgh-2017-000353supp001.pdf [file bmjgh-2017-000353supp001.pdf]

**Table: Synthesis of the content of the Committee on Economic, Social and Cultural Rights' General Comment No. 14 (2000) with the SDG metrics, pages 14-27 UN SDG resolution**

| No. | Right to Health Element                 | SDG Equivalent                                                          | SDG Target Equivalent                                                                                                                                                                                                                                                                                                                                                                                                                                                       |
|-----|-----------------------------------------|-------------------------------------------------------------------------|-----------------------------------------------------------------------------------------------------------------------------------------------------------------------------------------------------------------------------------------------------------------------------------------------------------------------------------------------------------------------------------------------------------------------------------------------------------------------------|
| 1   | Access to health care                   |                                                                         |                                                                                                                                                                                                                                                                                                                                                                                                                                                                             |
|     |                                         | Goal 1: End poverty in all its forms everywhere                         | <b>Target 1.3:</b> Implement nationally appropriate social protection systems and measures for all, including floors, and by 2030 achieve substantial coverage of the poor and the vulnerable.                                                                                                                                                                                                                                                                              |
|     |                                         | Goal 3: Ensure healthy lives and promote well-being for all at all ages | <b>Target 3.7:</b> By 2030, ensure universal access to sexual and reproductive health-care services, including for family planning, information and education, and the integration of reproductive health into national strategies and programmes.<br><b>Target 3.8:</b> Achieve UHC, including financial risk protection, access to quality essential health-care services and access to safe, effective, quality and affordable essential medicines and vaccines for all. |
|     |                                         | Goal 10: Reduce inequality within and among nations                     | <b>Target 10.4:</b> Adopt policies, especially fiscal, wage and social protection policies, and progressively achieve greater equality.                                                                                                                                                                                                                                                                                                                                     |
| 2   | Underlying determinants of health (UDH) |                                                                         |                                                                                                                                                                                                                                                                                                                                                                                                                                                                             |

| No. | Right to Health Element             | SDG Equivalent                                                                                       | SDG Target Equivalent                                                                                                                                                                                                                                                                                                                                                                                                                                                                                                                                                                                                                                                                                                                                                                                                                                                                                                                                                                                                                                                                                                                                                                                                                                                                                                                                                                                                                                                                                                                                                                                                                                                                                                                                                                       |
|-----|-------------------------------------|------------------------------------------------------------------------------------------------------|---------------------------------------------------------------------------------------------------------------------------------------------------------------------------------------------------------------------------------------------------------------------------------------------------------------------------------------------------------------------------------------------------------------------------------------------------------------------------------------------------------------------------------------------------------------------------------------------------------------------------------------------------------------------------------------------------------------------------------------------------------------------------------------------------------------------------------------------------------------------------------------------------------------------------------------------------------------------------------------------------------------------------------------------------------------------------------------------------------------------------------------------------------------------------------------------------------------------------------------------------------------------------------------------------------------------------------------------------------------------------------------------------------------------------------------------------------------------------------------------------------------------------------------------------------------------------------------------------------------------------------------------------------------------------------------------------------------------------------------------------------------------------------------------|
| 2a  | UDH: <i>access to adequate food</i> | Goal 2: End hunger, achieve food security and improved nutrition and promote sustainable agriculture | <p><b>Target 2.1:</b> By 2030, end hunger and ensure access by all people in particular the poor and people in vulnerable situations, including infants, to safe, nutritious and sufficient food all year round.</p> <p><b>Target 2.2:</b> By 2030, end all forms of malnutrition, including achieving, by 2025, the internationally agreed targets on stunting and wasting in children under 5 years of age, and address the nutritional needs of adolescent girls, pregnant and lactating women and older persons.</p> <p><b>Target 2.3:</b> By 2030, double the agricultural productivity and incomes of small-scale food producers, in particular women, indigenous peoples, family farmers, pastoralists and fishers, including through secure and equal access to land, other productive resources and inputs, knowledge, financial services, markets and opportunities for value addition and non-farm employment.</p> <p><b>Target 2.4:</b> By 2030, ensure sustainable food production systems and implement resilient agricultural practices that increase productivity and production that help maintain ecosystems, that strengthen capacity for adaptation to climate change, extreme weather, drought, flooding and other disasters and that progressively improve land and soil quality.</p> <p><b>Target 2.5:</b> By 2020, maintain the genetic diversity of seeds, cultivate plants and farmed and domesticated animals and their related wild species, including through soundly managed and diversified seed and plant banks at the national, regional and international levels, and promote access to and fair and equitable sharing of benefits arising from the utilisation of genetic resources and associated traditional knowledge, as internationally agreed.</p> |

| No. | Right to Health Element                            | SDG Equivalent                                                                                       | SDG Target Equivalent                                                                                                                                                                                                                                                                                                                                       |
|-----|----------------------------------------------------|------------------------------------------------------------------------------------------------------|-------------------------------------------------------------------------------------------------------------------------------------------------------------------------------------------------------------------------------------------------------------------------------------------------------------------------------------------------------------|
| 2b  | <i>UDH: access to adequate levels of nutrition</i> | Goal 2: End hunger, achieve food security and improved nutrition and promote sustainable agriculture | <b>Targets 2.1-2.5 (above)</b>                                                                                                                                                                                                                                                                                                                              |
| 2c  | <i>UDH: access to adequate housing</i>             | Goal 11: Make cities and human settlements inclusive, safe, resilient and sustainable                | <p><b>Target 11.1:</b> By 2030, ensure access for all to adequate, safe and affordable housing and basic services and upgrade slums.</p> <p><b>Target 11.3:</b> By 2030, enhance inclusive and sustainable urbanisation and capacity for participatory, integrated and sustainable human settlement planning and management in all countries.</p>           |
| 2d  | <i>UDH: access to safe and potable water</i>       | Goal 1: End poverty in all its forms everywhere                                                      | <b>Target 1.4:</b> By 2030, ensure that all men and women, in particular the poor and the vulnerable, have equal rights to economic resources, as well as access to basic services, ownership and control over land and other forms of property, inheritance, natural resources, appropriate new technology and financial services, including microfinance. |
| 2d  | <i>UDH: access to safe and potable water</i>       | Goal 3: Ensure healthy lives and promote well-being for all at all ages                              | <b>Target 3.9:</b> By 2030, substantially reduce the number of deaths and illnesses from hazardous chemicals and air, water and soil pollution and contamination.                                                                                                                                                                                           |

| No. | Right to Health Element                                   | SDG Equivalent                                                                         | SDG Target Equivalent                                                                                                                                                                                                                                                                                                                                                                                                                                                                                                                                                                                                                                                                                                                                                                                                                                                                                                                                                                             |
|-----|-----------------------------------------------------------|----------------------------------------------------------------------------------------|---------------------------------------------------------------------------------------------------------------------------------------------------------------------------------------------------------------------------------------------------------------------------------------------------------------------------------------------------------------------------------------------------------------------------------------------------------------------------------------------------------------------------------------------------------------------------------------------------------------------------------------------------------------------------------------------------------------------------------------------------------------------------------------------------------------------------------------------------------------------------------------------------------------------------------------------------------------------------------------------------|
| 2d  | <i>UDH: access to safe and potable water</i>              | Goal 6: Ensure availability and sustainable management of water and sanitation for all | <p><b>Target 6.1:</b> By 2030, achieve universal and equitable access to safe and affordable drinking water for all.</p> <p><b>Target 6.3:</b> By 2030, improve water quality by reducing pollution, eliminating dumping and minimising release of hazardous chemicals and materials, halving the proportion of untreated waste water and substantially increasing recycling and safe reuse globally.</p> <p><b>Target 6.4:</b> By 2030, substantially increase water-use efficiency across all sectors and ensure sustainable withdrawals and supply of freshwater to address water scarcity and substantially reduce the number of people suffering from water scarcity.</p> <p><b>Target 6.5:</b> By 2030, implement integrated water resources management at all levels, including through transboundary cooperation as appropriate.</p> <p><b>Target 6.6:</b> By 2020, protect and restore water-related ecosystems, including mountains, forests, wetlands, rivers, aquifers and lakes.</p> |
| 2e  | <i>UDH: access to adequate sanitation</i>                 | Goal 6: Ensure availability and sustainable management of water and sanitation for all | <p><b>Target 6.2:</b> By 2030, achieve access to adequate and equitable sanitation and hygiene for all and end open defecation, paying special attention to the needs of women and girls and those in vulnerable situations.</p>                                                                                                                                                                                                                                                                                                                                                                                                                                                                                                                                                                                                                                                                                                                                                                  |
| 2f  | <i>UDH: access to safe and healthy working conditions</i> | Goal 5: Achieve gender equality and empower all women and girls                        | <p><b>Target 5.4:</b> Recognise and value unpaid care and domestic work through the provision of public services, infrastructure and social protection policies and the promotion of shared responsibility within the household and the family as nationally appropriate.</p>                                                                                                                                                                                                                                                                                                                                                                                                                                                                                                                                                                                                                                                                                                                     |

| No. | Right to Health Element                                   | SDG Equivalent                                                                                                               | SDG Target Equivalent                                                                                                                                                                                                                                                                                                                                                                                                                                                                                                                                                                                                                                                                                                                                                                                                                                                          |
|-----|-----------------------------------------------------------|------------------------------------------------------------------------------------------------------------------------------|--------------------------------------------------------------------------------------------------------------------------------------------------------------------------------------------------------------------------------------------------------------------------------------------------------------------------------------------------------------------------------------------------------------------------------------------------------------------------------------------------------------------------------------------------------------------------------------------------------------------------------------------------------------------------------------------------------------------------------------------------------------------------------------------------------------------------------------------------------------------------------|
| 2f  | <i>UDH: access to safe and healthy working conditions</i> | Goal 8: Promote sustained, inclusive and sustainable economic growth, full and productive employment and decent work for all | <p><b>Target 8.5:</b> By 2030, achieve full and productive employment and decent work for all women and men, including for young people and persons with disabilities, and equal pay for work of equal value.</p> <p><b>Target 8.6:</b> By 2020, substantially reduce the proportion of youth not in employment, education or training.</p> <p><b>Target 8.7:</b> Take immediate and effective measures to eradicate forced labour, end modern slavery and human trafficking and secure the prohibition and elimination of the worst forms of child labour, including recruitment and use of child soldiers, and by 2025 end child labour in all its forms.</p> <p><b>Target 8.8:</b> Protect labour rights and promote safe and secure working environments for all workers, including migrant workers, in particular women migrants, and those in precarious employment.</p> |
| 2f  | <i>UDH: access to safe and healthy working conditions</i> | Goal 10: Reduce inequality within and among nations                                                                          | <p><b>Target 10.4:</b> Adopt policies, especially fiscal, wage and social protection policies, and progressively achieve greater equality.</p>                                                                                                                                                                                                                                                                                                                                                                                                                                                                                                                                                                                                                                                                                                                                 |
| 2g  | <i>UDH: access to healthy environment</i>                 | Goal 7: Ensure access to affordable, reliable, sustainable and modern energy for all                                         | <p><b>Target 7.1:</b> By 2030, ensure universal access to affordable, reliable and modern energy services.</p> <p><b>Target 7.2:</b> By 2030, increase substantially the share of renewable energy in the global energy mix.</p> <p><b>Target 7.3:</b> By 2030, double the global rate of improvement in energy efficiency.</p>                                                                                                                                                                                                                                                                                                                                                                                                                                                                                                                                                |

| No. | Right to Health Element                   | SDG Equivalent                                                                                                    | SDG Target Equivalent                                                                                                                                                                                                                                                                                                                                                                                                                                                                                                                                                                                                                                                                                                                                                                                                                                                                                                                                                                                                                                                           |
|-----|-------------------------------------------|-------------------------------------------------------------------------------------------------------------------|---------------------------------------------------------------------------------------------------------------------------------------------------------------------------------------------------------------------------------------------------------------------------------------------------------------------------------------------------------------------------------------------------------------------------------------------------------------------------------------------------------------------------------------------------------------------------------------------------------------------------------------------------------------------------------------------------------------------------------------------------------------------------------------------------------------------------------------------------------------------------------------------------------------------------------------------------------------------------------------------------------------------------------------------------------------------------------|
| 2g  | <i>UDH: access to healthy environment</i> | Goal 9: Build resilient infrastructure, promote inclusive and sustainable industrialisation and foster innovation | <p><b>Target 9.2:</b> Promote inclusive and sustainable industrialisation and, by 2030, significantly raise industry's share of employment and GDP, in line with national circumstances, and double its share in least developed countries.</p> <p><b>Target 9.4:</b> By 2030, upgrade infrastructure and retrofit industries to make them sustainable, with increased resource-use efficiency and greater adoption of clean and environmentally sound technologies and industrial processes, with all countries taking action in accordance with their respective capabilities.</p>                                                                                                                                                                                                                                                                                                                                                                                                                                                                                            |
| 2g  | <i>UDH: access to healthy environment</i> | Goal 12: Ensure sustainable consumption and production patterns                                                   | <p><b>Target 12.1:</b> Implement the 10-Year Framework of Programmes on Sustainable Consumption and Production Patterns, all countries taking action, with developed countries taking the lead, taking into account the development and capabilities of developing countries.</p> <p><b>Target 12.2:</b> By 2030, achieve the sustainable management and efficient use of natural resources.</p> <p><b>Target 12.4:</b> By 2020, achieve the environmentally sound management of chemicals and all wastes throughout their life cycle, in accordance with agreed international frameworks, and significantly reduce their release to air, water and soil in order to minimise their adverse impacts on human health and the environment.</p> <p><b>Target 12.5:</b> By 2030, substantially reduce waste generation through prevention, reduction, recycling and reuse.</p> <p><b>Target 12.6:</b> Encourage companies, especially large and transnational companies, to adopt sustainable practices and to integrate sustainability information into their reporting cycle.</p> |

| No. | Right to Health Element                   | SDG Equivalent                                                                                          | SDG Target Equivalent                                                                                                                                                                                                                                                                                                                                                                                                                                                                                                                                                                                                                                                                                                                                                                                                                                                                                                                                                                                                                                                                                                                                                                                                                                                                                                                                                                                                                                                                                                                                                                                                                                                                                           |
|-----|-------------------------------------------|---------------------------------------------------------------------------------------------------------|-----------------------------------------------------------------------------------------------------------------------------------------------------------------------------------------------------------------------------------------------------------------------------------------------------------------------------------------------------------------------------------------------------------------------------------------------------------------------------------------------------------------------------------------------------------------------------------------------------------------------------------------------------------------------------------------------------------------------------------------------------------------------------------------------------------------------------------------------------------------------------------------------------------------------------------------------------------------------------------------------------------------------------------------------------------------------------------------------------------------------------------------------------------------------------------------------------------------------------------------------------------------------------------------------------------------------------------------------------------------------------------------------------------------------------------------------------------------------------------------------------------------------------------------------------------------------------------------------------------------------------------------------------------------------------------------------------------------|
| 2g  | <i>UDH: access to healthy environment</i> | Goal 13: Take urgent action to combat climate change and its impacts                                    | <p><b>Target 13.1:</b> Strengthen resilience and adaptive capacity to climate-related hazards and natural disasters in all countries.</p> <p><b>Target 13.2:</b> Integrate climate change measures into national policies, strategies and planning.</p>                                                                                                                                                                                                                                                                                                                                                                                                                                                                                                                                                                                                                                                                                                                                                                                                                                                                                                                                                                                                                                                                                                                                                                                                                                                                                                                                                                                                                                                         |
| 2g  | <i>UDH: access to healthy environment</i> | Goal 14: Conserve and sustainably use the oceans, seas and marine resources for sustainable development | <p><b>Target 14.1:</b> By 2025, prevent and significantly reduce marine pollution of all kinds, in particular from land-based activities, including marine debris and nutrient pollution.</p> <p><b>Target 14.2:</b> By 2020, sustainably manage and protect marine and coastal ecosystems to avoid significant adverse impacts, including by strengthening their resilience, and take action for their restoration in order to achieve healthy and productive oceans.</p> <p><b>Target 14.3:</b> Minimise and address the impacts of ocean acidification, including through enhanced scientific cooperation at all levels.</p> <p><b>Target 14.4:</b> By 2020, effectively regulate harvesting and end overfishing, illegal, unreported and unregulated fishing and destructive fishing practices and implement science-based management plans, in order to restore fish stocks in the shortest time feasible, at least to levels that can produce maximum sustainable yield as determined by their biological characteristics.</p> <p><b>Target 14.5:</b> By 2020, conserve at least 10 per cent of coastal and marine areas, consistent with national and international law and based on the best available scientific information.</p> <p><b>Target 14.6:</b> By 2020, prohibit certain forms of fisheries subsidies which contribute to overcapacity and overfishing, eliminate subsidies that contribute to illegal, unreported and unregulated fishing and refrain from introducing new subsidies, recognising that appropriate and effective special and differential treatment for developing and least developed countries should be an integral part of the WTO fisheries subsidies negotiation.</p> |

| No. | Right to Health Element                                        | SDG Equivalent                                                                                                                                                                                        | SDG Target Equivalent                                                                                                                                                                                                                                                                                                                                                                                                                                                                                                                                                                                                                                                                                                                                                                                                                                                                                                                                                                                                                                                                                                                                                                  |
|-----|----------------------------------------------------------------|-------------------------------------------------------------------------------------------------------------------------------------------------------------------------------------------------------|----------------------------------------------------------------------------------------------------------------------------------------------------------------------------------------------------------------------------------------------------------------------------------------------------------------------------------------------------------------------------------------------------------------------------------------------------------------------------------------------------------------------------------------------------------------------------------------------------------------------------------------------------------------------------------------------------------------------------------------------------------------------------------------------------------------------------------------------------------------------------------------------------------------------------------------------------------------------------------------------------------------------------------------------------------------------------------------------------------------------------------------------------------------------------------------|
| 2g  | <i>UDH: access to healthy environment</i>                      | Goal 15: Protect, restore and promote sustainable use of terrestrial ecosystems, sustainably manage forests, combat desertification, and halt and reverse land degradation and halt biodiversity loss | <p><b>Target 15.1:</b> By 2020, ensure the conservation, restoration and sustainable use of terrestrial and inland freshwater ecosystems and their services, in particular forests, wetlands, mountains and drylands, in line with obligations under international agreements.</p> <p><b>Target 15.2:</b> By 2020, promote the implementation of sustainable management of all types of forests, halt deforestation, restore degraded forests and substantially increase afforestation and reforestation globally.</p> <p><b>Target 15.3:</b> By 2030, combat desertification, restore degraded land and soil, including land affected by desertification, drought and floods, and strive to achieve a land degradation-neutral world.</p> <p><b>Target 15.4:</b> By 2030, ensure the conservation of mountain ecosystems, including their biodiversity, in order to enhance their capacity to provide benefits that are essential for sustainable development.</p> <p><b>Target 15.5:</b> Take urgent and significant action to reduce the degradation of natural habitats, halt the loss of biodiversity and, by 2020, protect and prevent the extinction of threatened species.</p> |
| 2h  | <i>UDH: access to health-related education and information</i> | Goal 3. Ensure healthy lives and promote well-being for all at all ages                                                                                                                               | <p><b>Target 3.4:</b> By 2030, reduce by one third premature mortality from NCDs through prevention and treatment and promote mental health and well-being.</p> <p><b>Target 3.5:</b> Strengthen the prevention and treatment of substance abuse, including narcotic drug abuse and harmful use of alcohol.</p> <p><b>Target 3.7:</b> By 2030, ensure universal access to sexual and reproductive health-care services, including for family planning, information and education, and the integration of reproductive health into national strategies and programmes.</p>                                                                                                                                                                                                                                                                                                                                                                                                                                                                                                                                                                                                              |



| No. | Right to Health Element                                        | SDG Equivalent                                                                                               | SDG Target Equivalent                                                                                                                                                                                                                                                                                                                                                                                                                    |
|-----|----------------------------------------------------------------|--------------------------------------------------------------------------------------------------------------|------------------------------------------------------------------------------------------------------------------------------------------------------------------------------------------------------------------------------------------------------------------------------------------------------------------------------------------------------------------------------------------------------------------------------------------|
| 2h  | <i>UDH: access to health-related education and information</i> | Goal 4. Ensure inclusive and equitable quality education and promote lifelong learning opportunities for all | <b>Target 4.7:</b> By 2030, ensure that all learners acquire the knowledge and skills needed to promote sustainable development, including, among others, through education for sustainable development and sustainable lifestyles, human rights, gender equality, promotion of a culture of peace and non-violence, global citizenship and appreciation of cultural diversity and of culture's contribution to sustainable development. |
| 2h  | <i>UDH: access to health-related education and information</i> | Goal 5. Achieve gender equality and empower all women and girls                                              | <b>Target 5.6:</b> Ensure universal access to SRHR as agreed in accordance with the Programme of Action of the ICPD and the Beijing Platform for Action and the outcome documents of their review conferences.                                                                                                                                                                                                                           |
| 2h  | <i>UDH: access to health-related education and information</i> | Goal 12. Ensure sustainable consumption and production patterns                                              | <b>Target 12.8:</b> By 2030, ensure that people everywhere have the relevant information and awareness for sustainable development and lifestyles in harmony with nature.                                                                                                                                                                                                                                                                |
| 2h  | <i>UDH: access to health-related education and information</i> | Goal 13: Take urgent action to combat climate change and its impacts                                         | <b>Target 13.3:</b> Improve education, awareness-raising and human and institutional capacity on climate change mitigation, adaptation, impact reduction and early warning.                                                                                                                                                                                                                                                              |

| No. | Right to Health Element     | SDG Equivalent                                                                                       | SDG Target Equivalent                                                                                                                                                                                                                                                                                                                                                                                                                                                                                                                                                                                                                                                                                   |
|-----|-----------------------------|------------------------------------------------------------------------------------------------------|---------------------------------------------------------------------------------------------------------------------------------------------------------------------------------------------------------------------------------------------------------------------------------------------------------------------------------------------------------------------------------------------------------------------------------------------------------------------------------------------------------------------------------------------------------------------------------------------------------------------------------------------------------------------------------------------------------|
| 2i  | <i>UDH: gender equality</i> | Goal 1: End poverty in all its forms everywhere                                                      | <b>Target 1.2:</b> By 2030, reduce at least by half the proportion of men, women and children of all ages living in poverty in all its dimensions according to national definitions.                                                                                                                                                                                                                                                                                                                                                                                                                                                                                                                    |
| 2i  | <i>UDH: gender equality</i> | Goal 2: End hunger, achieve food security and improved nutrition and promote sustainable agriculture | <p><b>Target 2.2:</b> By 2030, end all forms of malnutrition, including achieving, by 2025, the internationally agreed targets on stunting and wasting in children under 5 years of age, and address the nutritional needs of adolescent girls, pregnant and lactating women and older persons.</p> <p><b>Target 2.3:</b> By 2030, double the agricultural productivity and incomes of small-scale food producers, in particular women, indigenous peoples, family farmers, pastoralists and fishers, including through secure and equal access to land, other productive resources and inputs, knowledge financial services, markets and opportunities for value addition and non-farm employment.</p> |
| 2i  | <i>UDH: gender equality</i> | Goal 3: Ensure healthy lives and promote well-being for all at all ages                              | <b>Target 3.7:</b> By 2030, ensure universal access to sexual and reproductive health-care services, including for family planning, information and education, and the integration of reproductive health into national strategies and programmes.                                                                                                                                                                                                                                                                                                                                                                                                                                                      |

| No. | Right to Health Element     | SDG Equivalent                                                                                               | SDG Target Equivalent                                                                                                                                                                                                                                                                                                                                                                                                                                                                                                                                                                                                                                                                                                                                                                                                                                                                                                                                                                                                                                                                                                                                                                                                                                                                                                                                                                                                                                    |
|-----|-----------------------------|--------------------------------------------------------------------------------------------------------------|----------------------------------------------------------------------------------------------------------------------------------------------------------------------------------------------------------------------------------------------------------------------------------------------------------------------------------------------------------------------------------------------------------------------------------------------------------------------------------------------------------------------------------------------------------------------------------------------------------------------------------------------------------------------------------------------------------------------------------------------------------------------------------------------------------------------------------------------------------------------------------------------------------------------------------------------------------------------------------------------------------------------------------------------------------------------------------------------------------------------------------------------------------------------------------------------------------------------------------------------------------------------------------------------------------------------------------------------------------------------------------------------------------------------------------------------------------|
| 2i  | <i>UDH: gender equality</i> | Goal 4: Ensure inclusive and equitable quality education and promote lifelong learning opportunities for all | <p><b>Target 4.1:</b> By 2030, ensure that all girls and boys complete free, equitable and quality primary and secondary education leading to relevant and effective learning outcomes.</p> <p><b>Target 4.2:</b> By 2030, ensure that all girls and boys have access to quality early childhood development, care and pre-primary education so that they are ready for primary education.</p> <p><b>Target 4.3:</b> By 2030, ensure equal access for all women and men to affordable and quality technical, vocational and tertiary education, including university.</p> <p><b>Target 4.5:</b> By 2030, eliminate gender disparities in education and ensure equal access to all levels of education and vocational training for the vulnerable, including persons with disabilities, indigenous peoples and children in vulnerable situations.</p> <p><b>Target 4.6:</b> BY 2030, ensure that all youth and a substantial proportion of adults, both men and women, achieve literacy and numeracy.</p> <p><b>Target 4.7:</b> By 2030, ensure that all learners acquire the knowledge and skills needed to promote sustainable development, including, among others, through education for sustainable development and sustainable lifestyles, human rights, gender equality, promotion of a culture of peace and non-violence, global citizenship and appreciation of cultural diversity and of culture’s contribution to sustainable development.</p> |
| 2i  | <i>UDH: gender equality</i> | Goal 5: Achieve gender equality and empower all women and girls                                              | <p><b>Target 5.1:</b> End all forms of discrimination against all women and girls everywhere.</p> <p><b>Target 5.5:</b> Ensure women’s full and effective participation and equal opportunities for leadership at all levels of decision-making in political, economic and public life.</p>                                                                                                                                                                                                                                                                                                                                                                                                                                                                                                                                                                                                                                                                                                                                                                                                                                                                                                                                                                                                                                                                                                                                                              |

| No. | Right to Health Element     | SDG Equivalent                                                                                                               | SDG Target Equivalent                                                                                                                                                                                                                                                                                                                                            |
|-----|-----------------------------|------------------------------------------------------------------------------------------------------------------------------|------------------------------------------------------------------------------------------------------------------------------------------------------------------------------------------------------------------------------------------------------------------------------------------------------------------------------------------------------------------|
| 2i  | <i>UDH: gender equality</i> | Goal 6: Ensure availability and sustainable management of water and sanitation for all                                       | <b>Target 6.2:</b> By 2030, achieve access to adequate and equitable sanitation and hygiene for all and end open defecation, paying special attention to the needs of women and girls and those in vulnerable situations.                                                                                                                                        |
| 2i  | <i>UDH: gender equality</i> | Goal 8: Promote sustained, inclusive and sustainable economic growth, full and productive employment and decent work for all | <b>Target 8.5:</b> By 2030, achieve full and productive employment and decent work for all women and men, including for young people and persons with disabilities, and equal pay for work of equal value.                                                                                                                                                       |
| 2i  | <i>UDH: gender equality</i> | Goal 10: Reduce inequality within and among countries                                                                        | <p><b>Target 10.2:</b> By 2030, empower and promote the social, economic and political inclusion of all, irrespective of age, sex, disability, race, ethnicity, origin, religion or economic or other status.</p> <p><b>Target 10.4:</b> Adopt policies, especially fiscal, wage and social protection policies, and progressively achieve greater equality.</p> |

| No. | Right to Health Element     | SDG Equivalent                                                                                                                                                                             | SDG Target Equivalent                                                                                                                                                                                                                                                                                                                                                                                                                                                                                                                       |
|-----|-----------------------------|--------------------------------------------------------------------------------------------------------------------------------------------------------------------------------------------|---------------------------------------------------------------------------------------------------------------------------------------------------------------------------------------------------------------------------------------------------------------------------------------------------------------------------------------------------------------------------------------------------------------------------------------------------------------------------------------------------------------------------------------------|
| 2i  | <i>UDH: gender equality</i> | Goal 11: Make cities and human settlements inclusive, safe, resilient and sustainable                                                                                                      | <p><b>Target 11.2:</b> By 2030, provide access to safe, affordable, accessible and sustainable transport systems for all, improving road safety, notably by expanding public transport, with special attention to the needs of those in vulnerable situations, women, children, persons with disabilities and older persons.</p> <p><b>Target 11.7:</b> By 2030, provide universal access to safe, inclusive and accessible, green and public spaces, in particular for women and children, older persons and person with disabilities.</p> |
| 2i  | <i>UDH: gender equality</i> | Goal 16: Promote peaceful and inclusive societies for sustainable development, provide access to justice for all and build effective, accountable and inclusive institutions at all levels | <p><b>Target 16.3:</b> Promote the rule of law at the national and international levels and ensure equal access to justice for all.</p> <p><b>Target 16.7:</b> Ensure responsive, inclusive, participatory and representative decision-making at all levels.</p>                                                                                                                                                                                                                                                                            |
